# Supplementary material
Source: PubMed Central journal article supplement (PMC10089698)

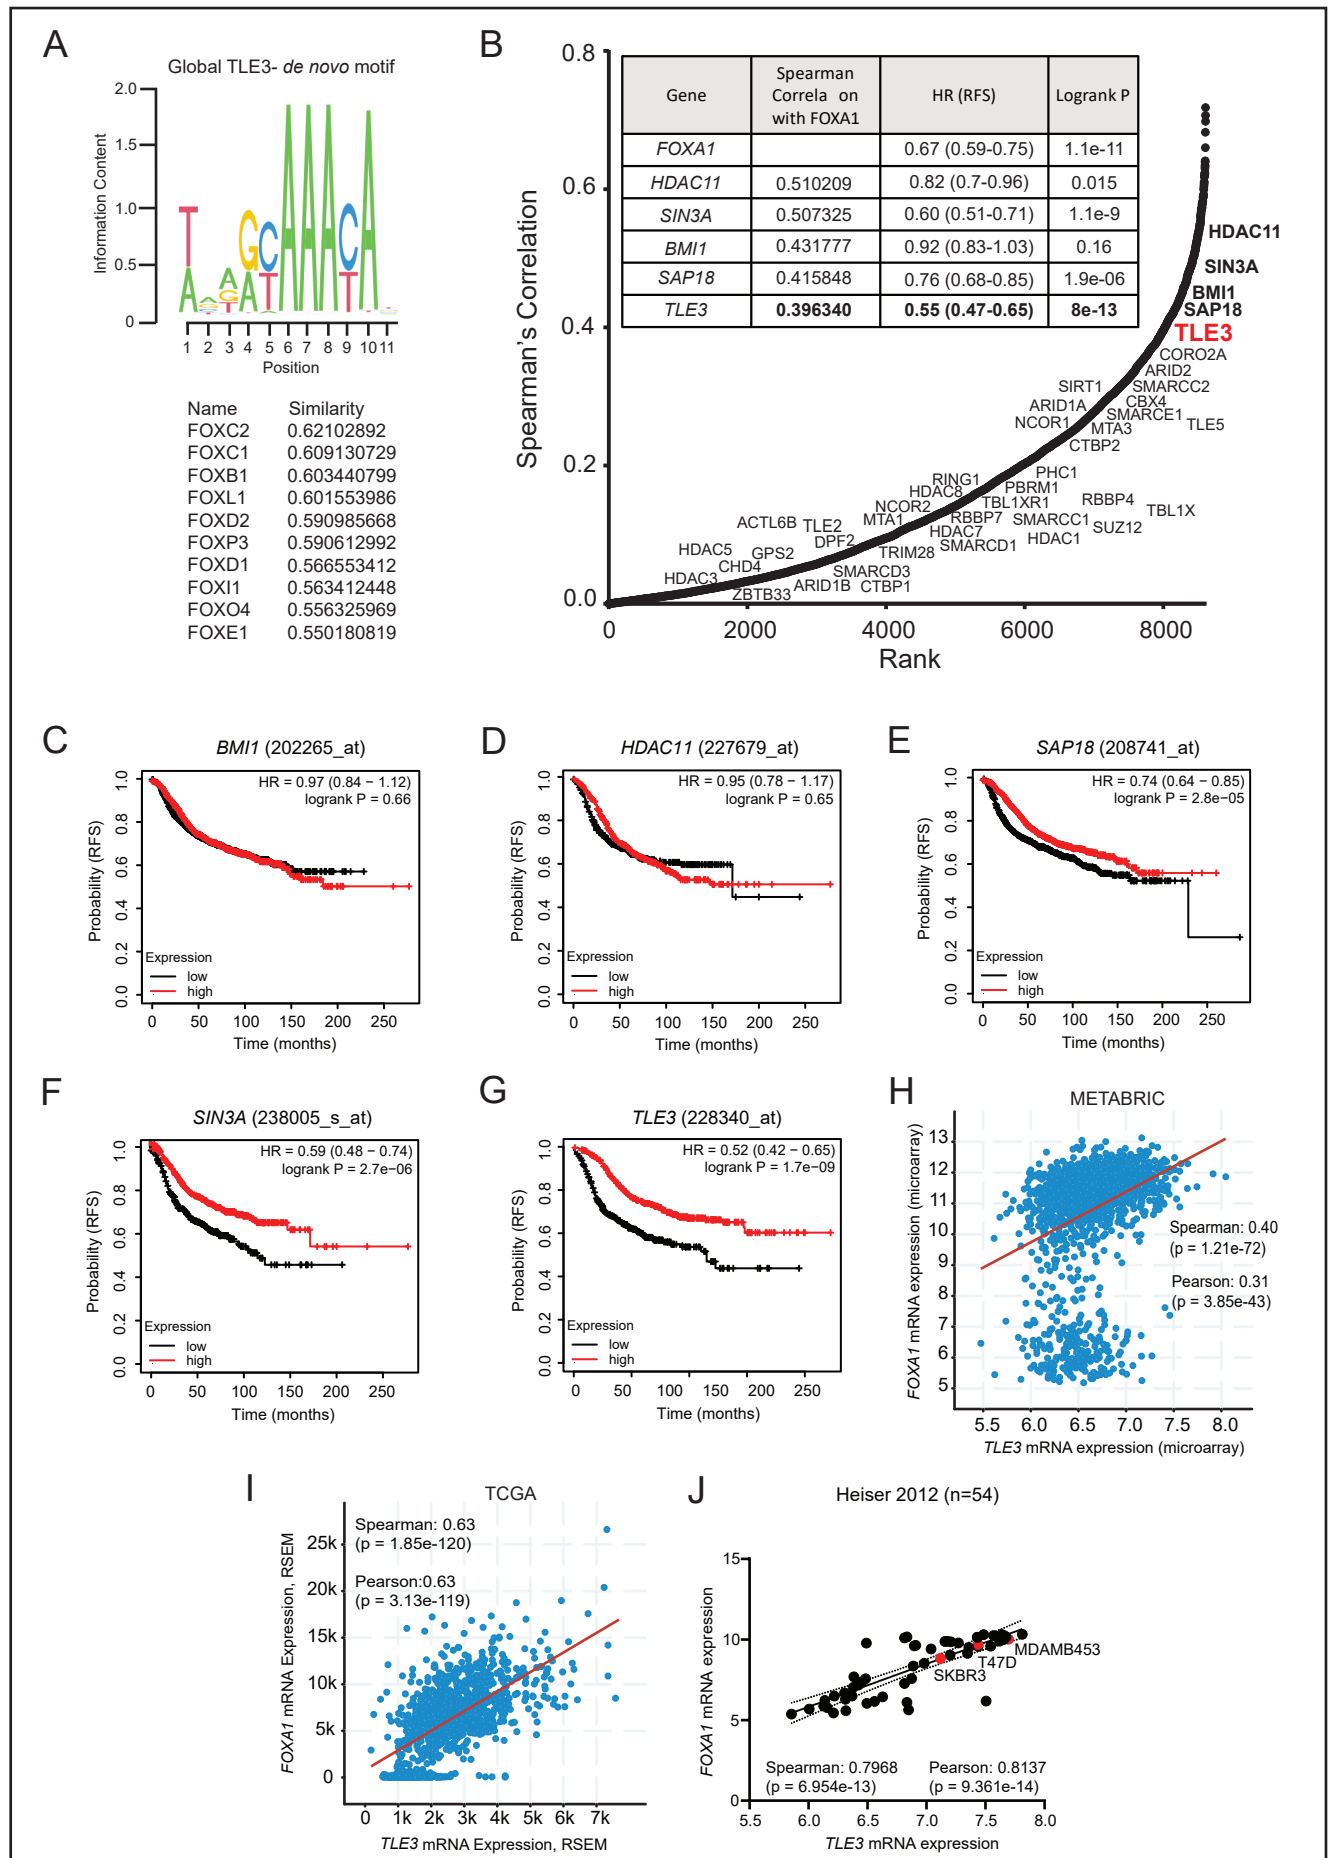

Supplement: NIHMS1870564-supplement-10.pdf [file NIHMS1870564-supplement-10.pdf]

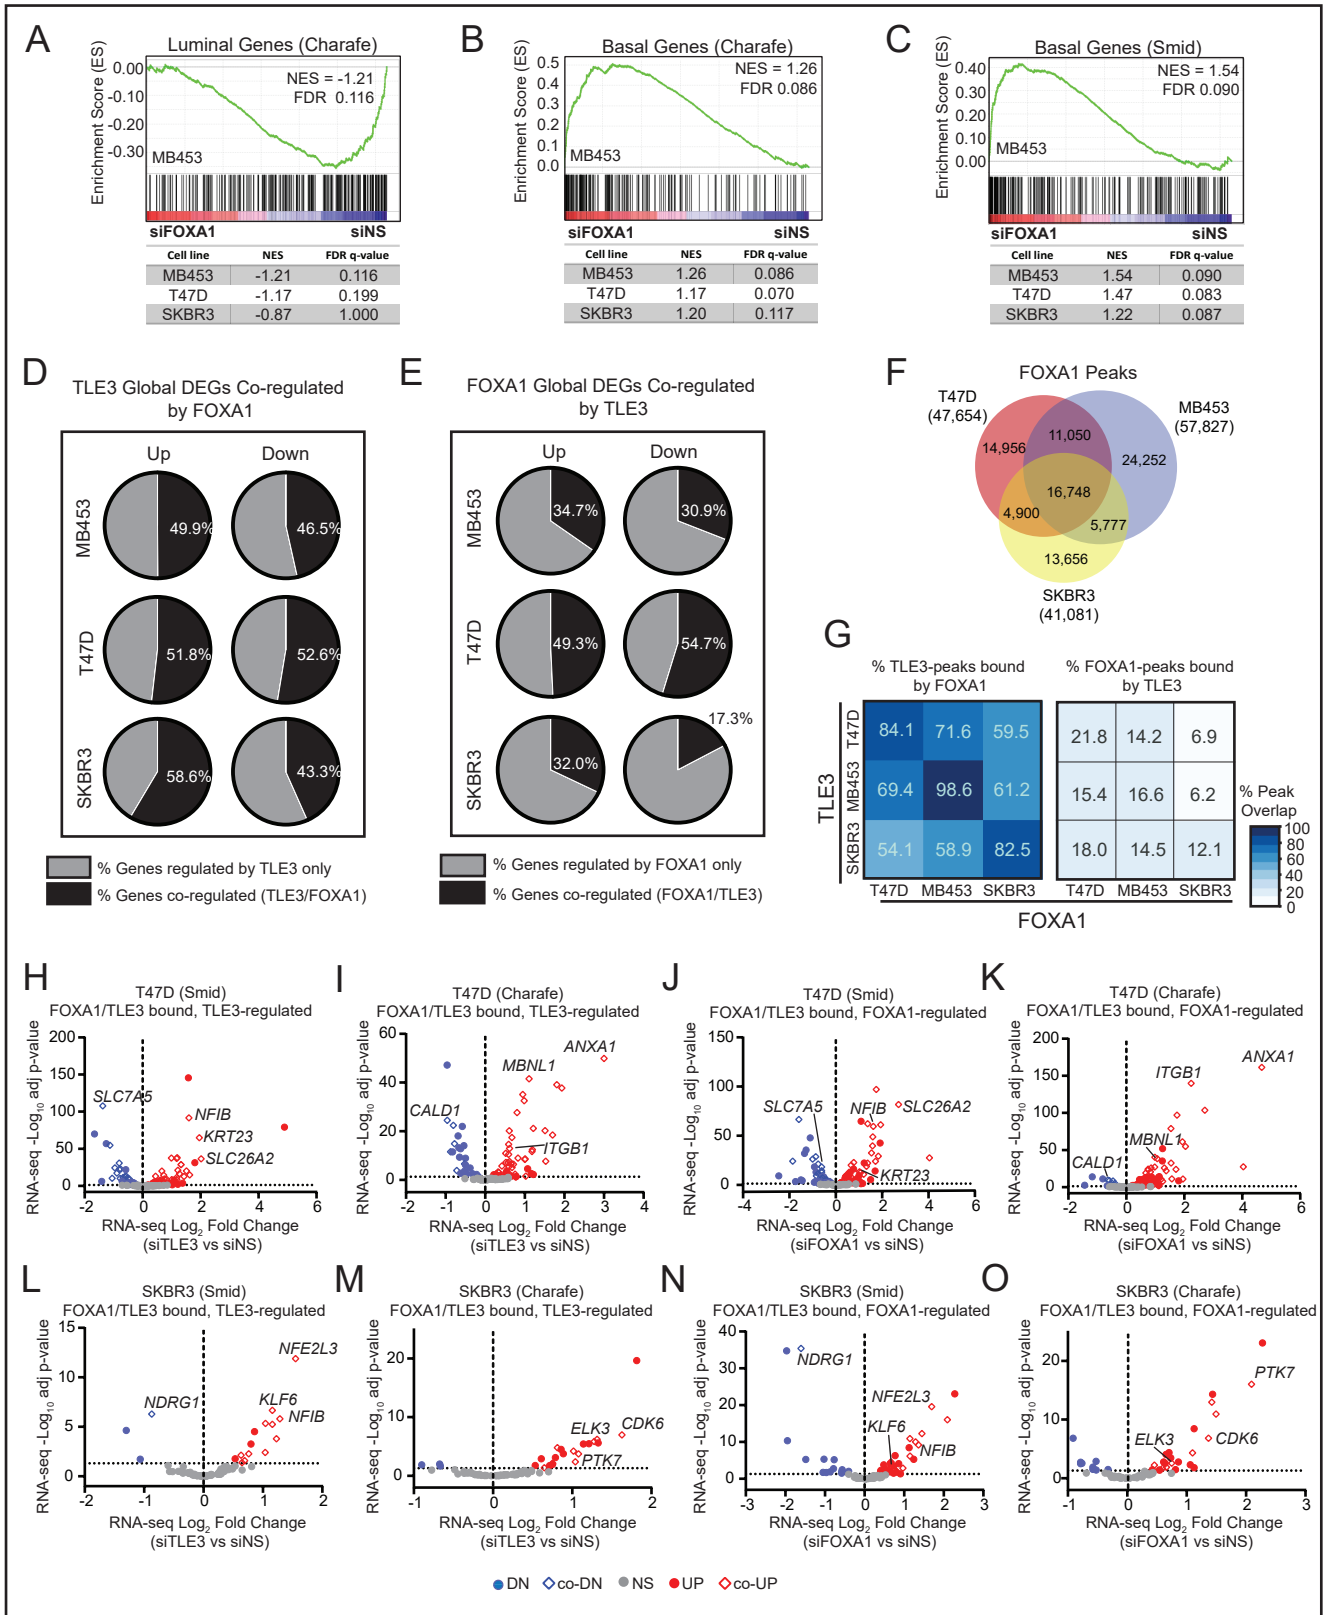

SFig. 6

Supplement: NIHMS1870564-supplement-12.pdf [file NIHMS1870564-supplement-12.pdf]

**A**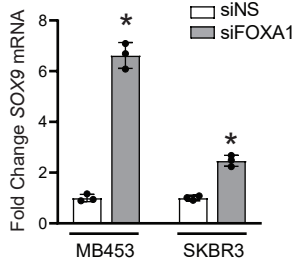**B**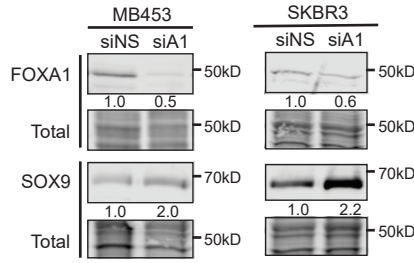**C**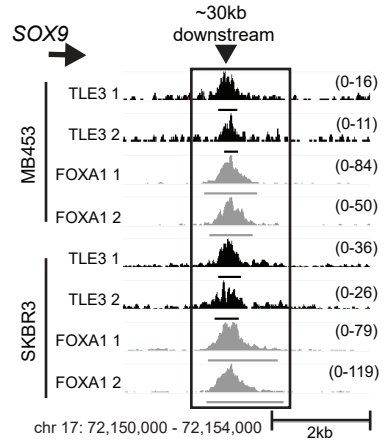**D**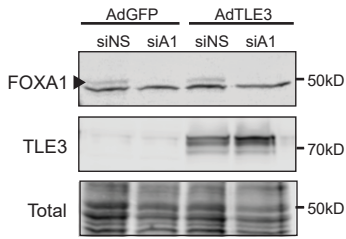**E**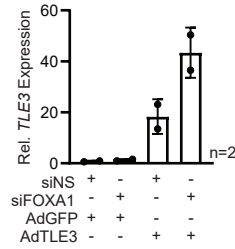**F**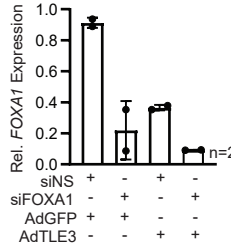**G**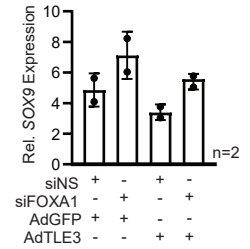**H**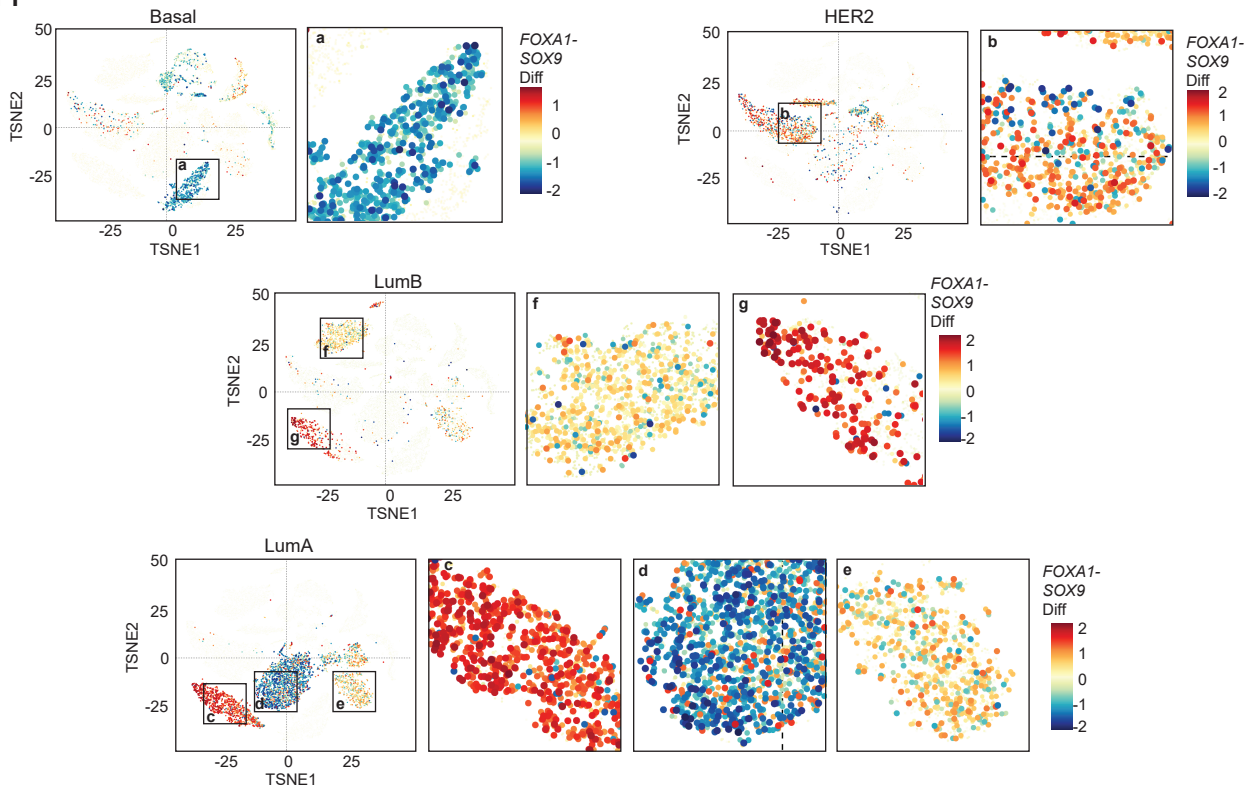

Supplemental Figure 7

Supplement: NIHMS1870564-supplement-14.pdf [file NIHMS1870564-supplement-14.pdf]

Gained TLE3 Peaks

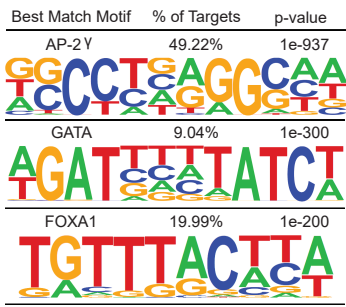

Supplemental Figure 8

Supplement: NIHMS1870564-supplement-16.pdf [file NIHMS1870564-supplement-16.pdf]

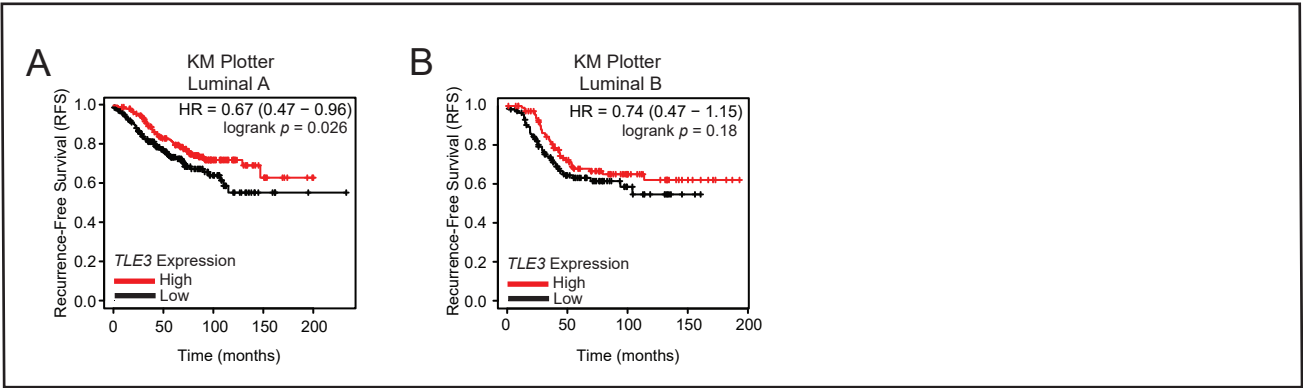

Supplemental Figure 1

Supplement: NIHMS1870564-supplement-2.pdf [file NIHMS1870564-supplement-2.pdf]

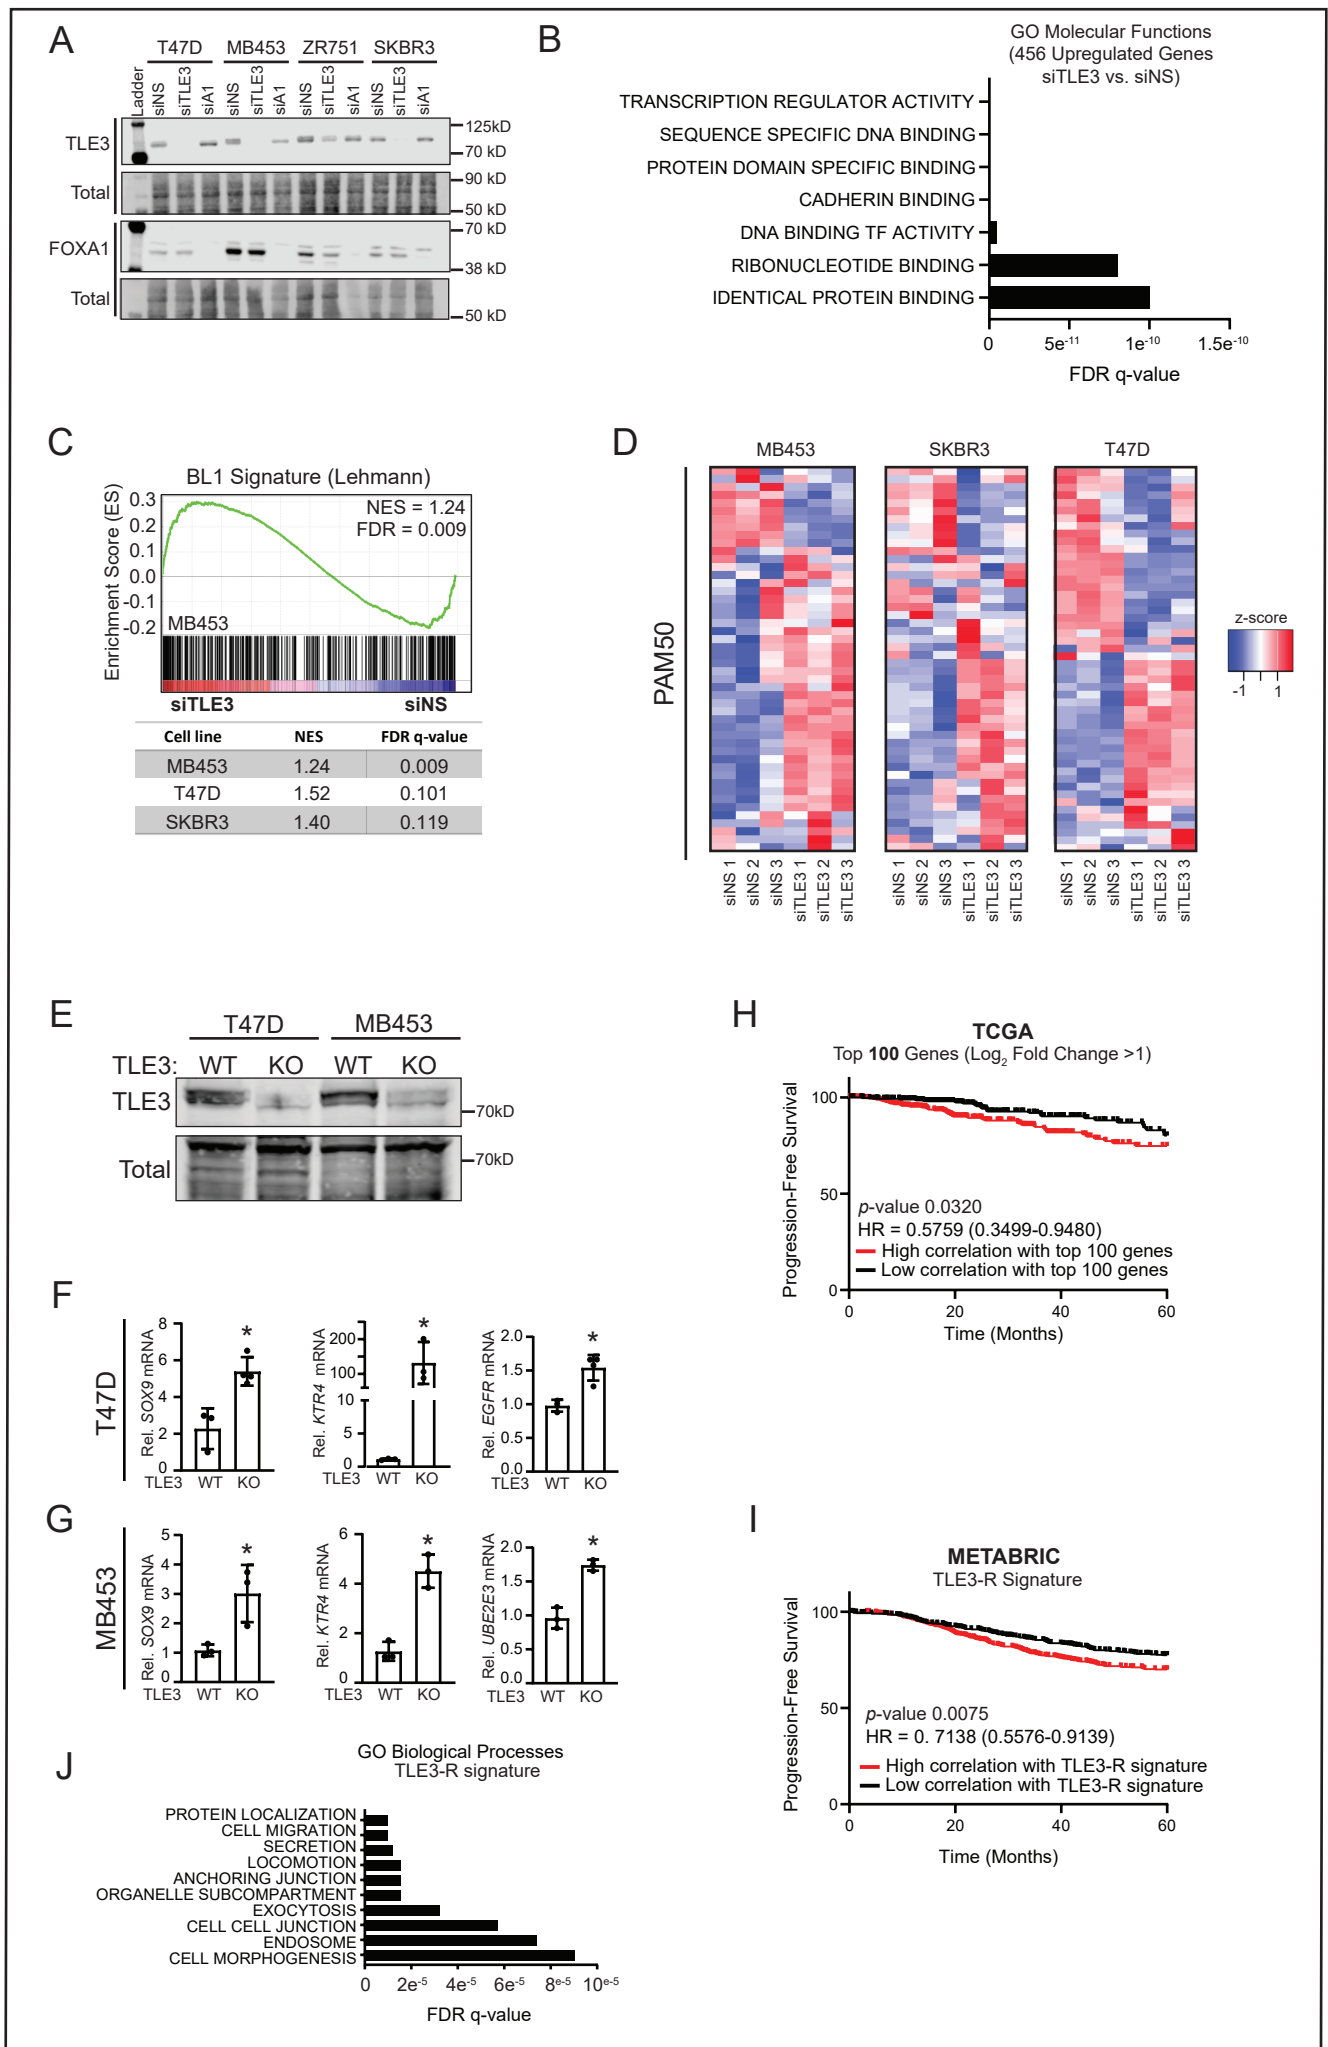

Sup. Fig. 2

Supplement: NIHMS1870564-supplement-4.pdf [file NIHMS1870564-supplement-4.pdf]

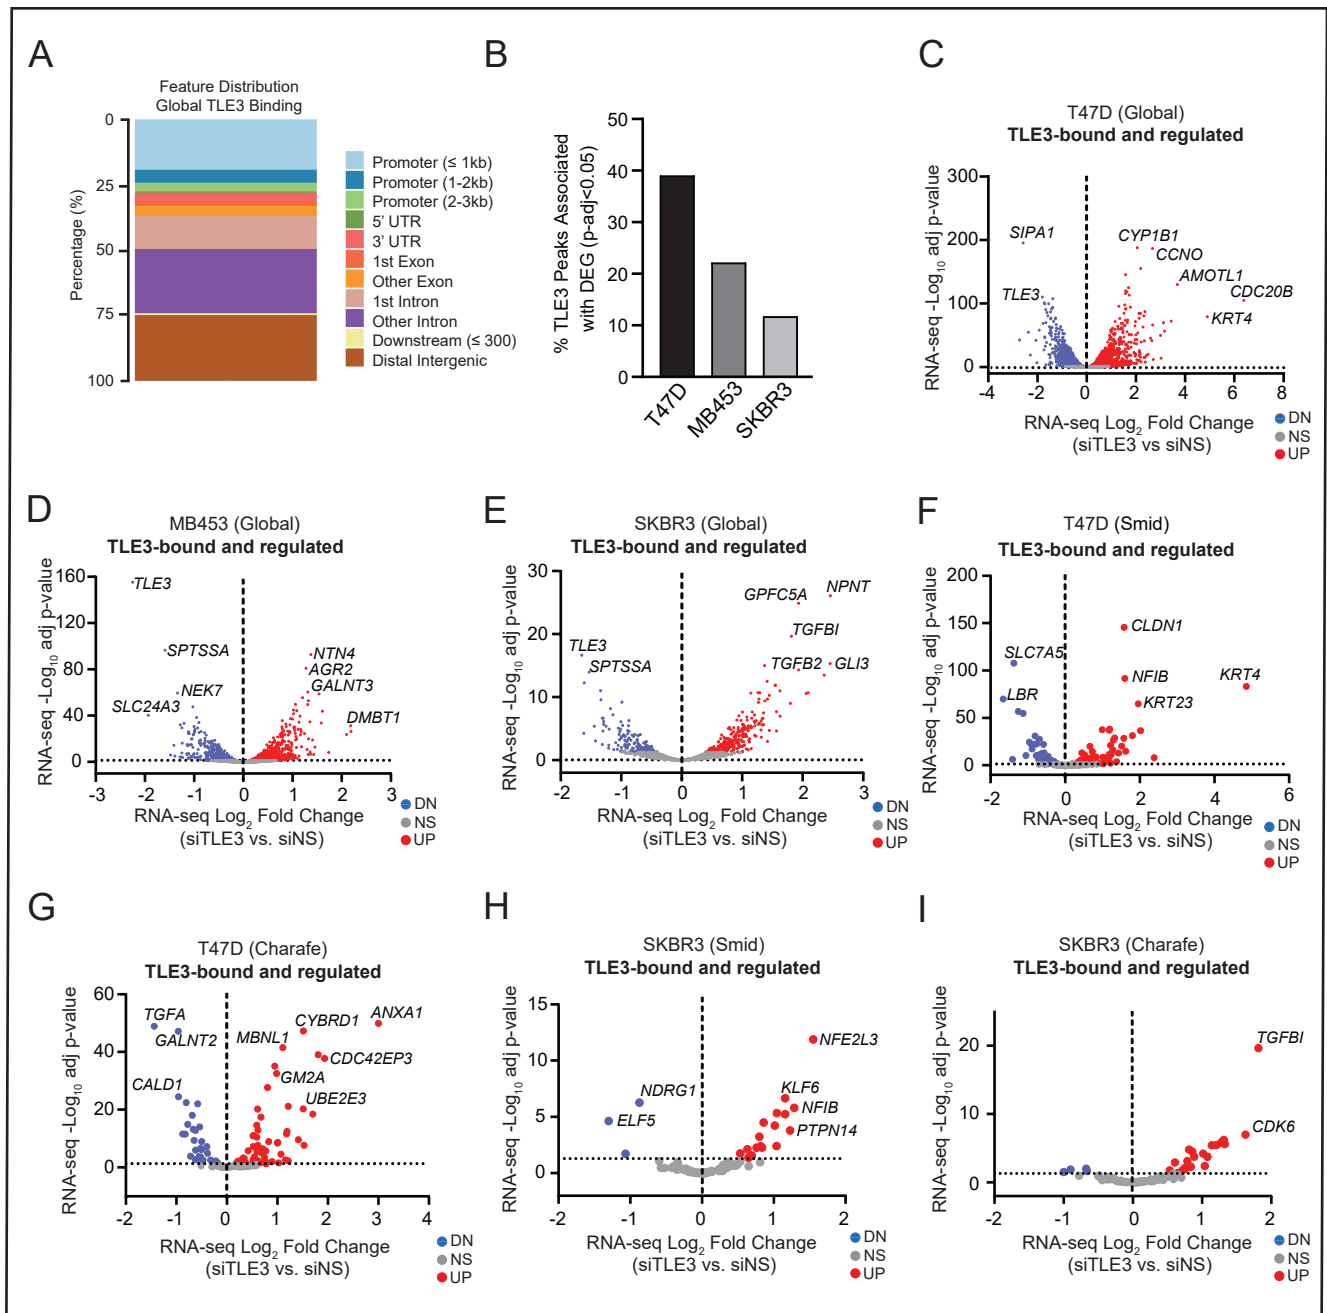

Sfig. 3

Supplement: NIHMS1870564-supplement-6.pdf [file NIHMS1870564-supplement-6.pdf]

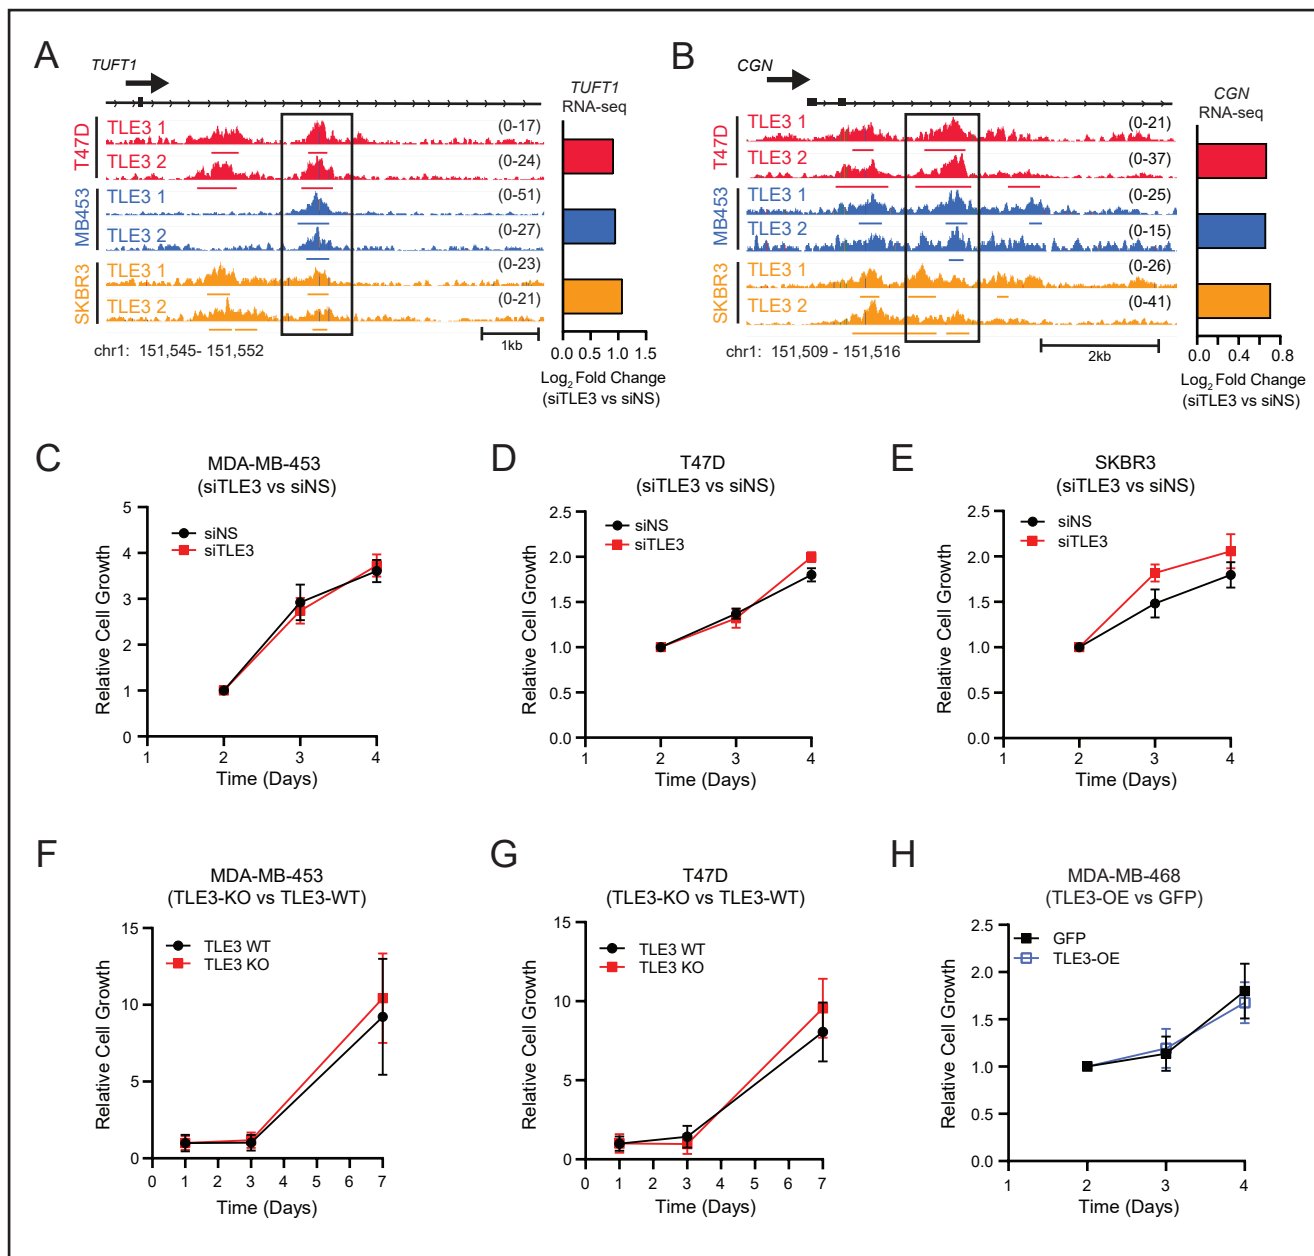

SFig. 4

Supplement: NIHMS1870564-supplement-8.pdf [file NIHMS1870564-supplement-8.pdf]
